# Supplementary material
Source: publisher figshare collection journal article supplement (https://acs.figshare.com/ndownloader/files/4572604)
Supplement: Supplementary file 1 [file 4572604]

data_5ohfe
_publ_contact_author_name        'Prof. Sabyasachi Sarkar'
_publ_contact_author_address
;Department of Chemistry
Indian Institute of Technology Kanpur
Kanpur, U.P.
India - 208016
;
_publ_contact_author_email       abya@iitk.ac.in
_publ_contact_author_phone       915122597265
_publ_contact_author_fax         915122597265
loop_
_publ_author_name
_publ_author_address
'Sarkar, Prof. Sabyasachi '
;Department of Chemistry
Indian Institute of Technology Kanpur
Kanpur, U.P.
India - 208016
;
'G. J., Abhilash'
;Department of Chemistry
Indian Institute of Technology Kanpur
Kanpur, U.P.
India - 208016
;
'Maji, Suman'
;Department of Chemistry
Indian Institute of Technology Kanpur
Kanpur, U.P.
India - 208016
Email: sumanm@iitk.ac.in
;
'Bhuyan, Jagannath'
;Department of Chemistry
Indian Institute of Technology Kanpur
Kanpur, U.P.
India - 208016
;
'Pal , Kuntal'
;Department of Chemistry
Indian Institute of Technology Kanpur
Kanpur, U.P.
India - 208016
Email: kuntal@iitk.ac.in
;
 
_audit_creation_method           SHELXL-97
_chemical_name_systematic        ?
_chemical_name_common            ?
_chemical_melting_point          ?
_chemical_formula_moiety         'C56 H55 Cl Fe N4 O14, C H2 Cl2, N O3'
_chemical_formula_sum            'C57 H57 Cl3 Fe N5 O17'
_chemical_formula_weight         1246.28
 
loop_
_atom_type_symbol
_atom_type_description
_atom_type_scat_dispersion_real
_atom_type_scat_dispersion_imag
_atom_type_scat_source
C C 0.0033 0.0016 'International Tables Vol C Tables 4.2.6.8 and 6.1.1.4'
H H 0.0000 0.0000 'International Tables Vol C Tables 4.2.6.8 and 6.1.1.4'
N N 0.0061 0.0033 'International Tables Vol C Tables 4.2.6.8 and 6.1.1.4'
O O 0.0106 0.0060 'International Tables Vol C Tables 4.2.6.8 and 6.1.1.4'
Fe Fe 0.3463 0.8444 'International Tables Vol C Tables 4.2.6.8 and 6.1.1.4'
Cl Cl 0.1484 0.1585 'International Tables Vol C Tables 4.2.6.8 and 6.1.1.4'
 
_symmetry_cell_setting           triclinic
_symmetry_space_group_name_H-M   'P -1'
_symmetry_int_tables_number      2
 
loop_
_symmetry_equiv_pos_as_xyz
'x, y, z'
'-x, -y, -z'
 
_cell_length_a                   14.899(5)
_cell_length_b                   15.181(5)
_cell_length_c                   16.891(5)
_cell_angle_alpha                67.672(5)
_cell_angle_beta                 67.322(5)
_cell_angle_gamma                81.697(5)
_cell_volume                     3260.8(18)
_cell_formula_units_Z            2
_cell_measurement_temperature    100(2)
_cell_measurement_reflns_used    16305
_cell_measurement_theta_min      2.1
_cell_measurement_theta_max      28.4
 
_exptl_crystal_description       Needle
_exptl_crystal_colour            Purple
_exptl_crystal_size_max          0.20
_exptl_crystal_size_mid          0.10
_exptl_crystal_size_min          0.08
_exptl_crystal_density_meas      ?
_exptl_crystal_density_diffrn    1.269
_exptl_crystal_density_method    'not measured'
_exptl_crystal_F_000             1294
_exptl_absorpt_coefficient_mu    0.421
_exptl_absorpt_correction_type   Empirical
_exptl_absorpt_correction_T_min  0.953
_exptl_absorpt_correction_T_max  0.967
_exptl_absorpt_process_details   ?
 
_exptl_special_details
;
 ?
;
 
_diffrn_ambient_temperature      100(2)
_diffrn_radiation_probe          x-ray
_diffrn_radiation_type           MoK\a
_diffrn_radiation_wavelength     0.71069
_diffrn_source                   'fine-focus sealed tube'
_diffrn_radiation_monochromator  graphite
_diffrn_measurement_device_type  'Bruker SMART APEX'
_diffrn_measurement_method       /w-scans
_diffrn_detector_area_resol_mean ?
_diffrn_standards_number         ?
_diffrn_standards_interval_count ?
_diffrn_standards_interval_time  ?
_diffrn_standards_decay_%        ?
_diffrn_reflns_number            22021
_diffrn_reflns_av_R_equivalents  0.0626
_diffrn_reflns_av_sigmaI/netI    0.1721
_diffrn_reflns_limit_h_min       -19
_diffrn_reflns_limit_h_max       18
_diffrn_reflns_limit_k_min       -20
_diffrn_reflns_limit_k_max       18
_diffrn_reflns_limit_l_min       -22
_diffrn_reflns_limit_l_max       21
_diffrn_reflns_theta_min         2.08
_diffrn_reflns_theta_max         28.35
_reflns_number_total             16305
_reflns_number_gt                8210
_reflns_threshold_expression     >2sigma(I)
 
_computing_data_collection       'SMART 5.628 (Bruker, 2003)'
_computing_cell_refinement       'SAINT 6.45 ( Bruker, 2003)'
_computing_data_reduction        'SAINT 6.45  (Bruker, 2003)'
_computing_structure_solution    SIR-97
_computing_structure_refinement  'SHELXL-97 (Sheldrick, 1997)'
_computing_molecular_graphics    'Diamond 2.1e, Ortep'
_computing_publication_material  ?
 
_refine_special_details
;
 Refinement of F^2^ against ALL reflections.  The weighted R-factor wR and
 goodness of fit S are based on F^2^, conventional R-factors R are based
 on F, with F set to zero for negative F^2^. The threshold expression of
 F^2^ > 2sigma(F^2^) is used only for calculating R-factors(gt) etc. and is
 not relevant to the choice of reflections for refinement.  R-factors based
 on F^2^ are statistically about twice as large as those based on F, and R-
 factors based on ALL data will be even larger.
;
 
_refine_ls_structure_factor_coef Fsqd
_refine_ls_matrix_type           full
_refine_ls_weighting_scheme      calc
_refine_ls_weighting_details
'calc w=1/[\s^2^(Fo^2^)+(0.1327P)^2^+0.0000P] where P=(Fo^2^+2Fc^2^)/3'
_atom_sites_solution_primary     direct
_atom_sites_solution_secondary   difmap
_atom_sites_solution_hydrogens   geom
_refine_ls_hydrogen_treatment    mixed
_refine_ls_extinction_method     none
_refine_ls_extinction_coef       ?
_refine_ls_number_reflns         15581
_refine_ls_number_parameters     739
_refine_ls_number_restraints     0
_refine_ls_R_factor_all          0.1807
_refine_ls_R_factor_gt           0.0901
_refine_ls_wR_factor_ref         0.2453
_refine_ls_wR_factor_gt          0.2197
_refine_ls_goodness_of_fit_ref   1.044
_refine_ls_restrained_S_all      1.044
_refine_ls_shift/su_max          0.000
_refine_ls_shift/su_mean         0.000
 
loop_
_atom_site_label
_atom_site_type_symbol
_atom_site_fract_x
_atom_site_fract_y
_atom_site_fract_z
_atom_site_U_iso_or_equiv
_atom_site_adp_type
_atom_site_occupancy
_atom_site_symmetry_multiplicity
_atom_site_calc_flag
_atom_site_refinement_flags
_atom_site_disorder_assembly
_atom_site_disorder_group
Fe1 Fe 0.97430(6) 0.18518(5) 0.76471(6) 0.0141(2) Uani 1 1 d . . .
Cl1 Cl 1.04275(11) 0.27373(10) 0.61160(10) 0.0233(3) Uani 1 1 d . . .
Cl2 Cl 0.37374(16) 0.75910(17) 0.72978(16) 0.0550(6) Uani 1 1 d . . .
Cl3 Cl 0.3775(2) 0.91124(18) 0.55946(18) 0.0724(8) Uani 1 1 d . . .
O1 O 0.9935(3) 0.3792(3) 0.9155(3) 0.0194(9) Uani 1 1 d . . .
H1 H 0.9658 0.3306 0.9563 0.029 Uiso 1 1 calc R . .
O2 O 1.1488(3) 0.6931(3) 0.7379(3) 0.0225(9) Uani 1 1 d . . .
O3 O 1.2023(3) 0.7196(3) 0.5604(3) 0.0231(9) Uani 1 1 d . . .
O4 O 1.1652(3) 0.5896(3) 0.5056(3) 0.0296(11) Uani 1 1 d . . .
O5 O 0.4031(4) 0.3383(5) 0.9311(4) 0.0649(19) Uani 1 1 d . . .
O6 O 0.3726(4) 0.4040(4) 0.7712(4) 0.0478(14) Uani 1 1 d . . .
O7 O 0.5184(3) 0.4181(3) 0.6124(3) 0.0300(11) Uani 1 1 d . . .
O8 O 0.8352(3) -0.3492(3) 0.8538(3) 0.0229(9) Uani 1 1 d . . .
O9 O 0.8083(3) -0.3302(3) 0.6995(3) 0.0224(9) Uani 1 1 d . . .
O10 O 0.8368(3) -0.1632(3) 0.5601(3) 0.0242(10) Uani 1 1 d . . .
O11 O 1.3863(3) -0.1911(3) 0.9070(3) 0.0354(12) Uani 1 1 d . . .
O12 O 1.5516(3) -0.0938(3) 0.7963(4) 0.0408(13) Uani 1 1 d . . .
O13 O 1.5511(3) 0.0825(3) 0.6785(4) 0.0356(12) Uani 1 1 d . . .
O14 O 0.9024(3) 0.1067(3) 0.9076(3) 0.0204(9) Uani 1 1 d . . .
O15 O 0.9235(3) 0.1979(3) 0.0120(3) 0.0205(9) Uani 1 1 d . . .
O16 O 1.0054(4) 0.0663(3) 0.0389(3) 0.0376(12) Uani 1 1 d . . .
O17 O 1.0491(3) 0.1901(3) 0.0498(3) 0.0308(11) Uani 1 1 d . . .
N1 N 1.0838(3) 0.2197(3) 0.7976(3) 0.0176(10) Uani 1 1 d . . .
N2 N 0.8943(3) 0.3002(3) 0.7979(3) 0.0131(10) Uani 1 1 d . . .
N3 N 0.8583(4) 0.1436(3) 0.7500(3) 0.0201(11) Uani 1 1 d . . .
N4 N 1.0444(3) 0.0595(3) 0.7581(3) 0.0162(10) Uani 1 1 d . . .
N5 N 0.9936(4) 0.1499(4) 0.0352(3) 0.0223(11) Uani 1 1 d . . .
C1 C 1.1690(4) 0.1656(4) 0.8004(4) 0.0162(8) Uani 1 1 d . . .
C2 C 1.2257(4) 0.2128(4) 0.8260(4) 0.0201(13) Uani 1 1 d . . .
H2 H 1.2852 0.1931 0.8327 0.024 Uiso 1 1 calc R . .
C3 C 1.1754(4) 0.2904(4) 0.8381(4) 0.0221(13) Uani 1 1 d . . .
H3 H 1.1936 0.3345 0.8552 0.027 Uiso 1 1 calc R . .
C4 C 1.0879(4) 0.2932(4) 0.8196(4) 0.0191(12) Uani 1 1 d . . .
C5 C 1.0154(4) 0.3717(4) 0.8270(4) 0.0160(12) Uani 1 1 d . . .
C6 C 0.9201(4) 0.3657(4) 0.8181(4) 0.0183(9) Uani 1 1 d . . .
C7 C 0.8472(4) 0.4382(4) 0.8277(4) 0.0183(9) Uani 1 1 d . . .
H7 H 0.8504 0.4908 0.8421 0.022 Uiso 1 1 calc R . .
C8 C 0.7717(4) 0.4147(4) 0.8116(4) 0.0183(3) Uani 1 1 d . . .
H8 H 0.7142 0.4483 0.8124 0.022 Uiso 1 1 calc R . .
C9 C 0.7999(4) 0.3263(4) 0.7929(4) 0.0176(12) Uani 1 1 d . . .
C10 C 0.7472(4) 0.2767(4) 0.7730(4) 0.0183(9) Uani 1 1 d . . .
C11 C 0.7718(4) 0.1882(4) 0.7564(4) 0.0189(12) Uani 1 1 d . . .
C12 C 0.7064(5) 0.1342(4) 0.7494(4) 0.0207(13) Uani 1 1 d . . .
H12 H 0.6430 0.1505 0.7520 0.025 Uiso 1 1 calc R . .
C13 C 0.7544(4) 0.0547(4) 0.7383(4) 0.0209(13) Uani 1 1 d . . .
H13 H 0.7298 0.0059 0.7318 0.025 Uiso 1 1 calc R . .
C14 C 0.8500(5) 0.0591(4) 0.7383(4) 0.0181(12) Uani 1 1 d . . .
C15 C 0.9216(4) -0.0121(4) 0.7339(4) 0.0148(11) Uani 1 1 d . . .
C16 C 1.0112(4) -0.0092(4) 0.7404(4) 0.0180(12) Uani 1 1 d . . .
C17 C 1.0864(4) -0.0792(4) 0.7299(4) 0.0206(13) Uani 1 1 d . . .
H17 H 1.0837 -0.1331 0.7171 0.025 Uiso 1 1 calc R . .
C18 C 1.1619(4) -0.0525(4) 0.7419(4) 0.0169(12) Uani 1 1 d . . .
H18 H 1.2209 -0.0841 0.7379 0.020 Uiso 1 1 calc R . .
C19 C 1.1345(4) 0.0317(4) 0.7613(4) 0.0157(11) Uani 1 1 d . . .
C20 C 1.1936(4) 0.0819(4) 0.7824(4) 0.0162(8) Uani 1 1 d . . .
C21 C 1.0661(4) 0.4665(4) 0.7547(4) 0.0169(12) Uani 1 1 d . . .
C22 C 1.0818(4) 0.5347(4) 0.7832(4) 0.0189(12) Uani 1 1 d . . .
H22 H 1.0621 0.5238 0.8455 0.023 Uiso 1 1 calc R . .
C23 C 1.1276(4) 0.6207(4) 0.7181(4) 0.0172(12) Uani 1 1 d . . .
C24 C 1.1542(4) 0.6371(4) 0.6242(4) 0.0224(13) Uani 1 1 d . . .
C25 C 1.1373(4) 0.5657(4) 0.5977(4) 0.0207(13) Uani 1 1 d . . .
C26 C 1.0923(4) 0.4807(4) 0.6623(4) 0.0226(14) Uani 1 1 d . . .
H26 H 1.0800 0.4343 0.6443 0.027 Uiso 1 1 calc R . .
C27 C 0.6479(4) 0.3136(4) 0.7744(4) 0.0183(9) Uani 1 1 d . . .
C28 C 0.5731(5) 0.3087(5) 0.8558(5) 0.0332(16) Uani 1 1 d . . .
H28 H 0.5842 0.2843 0.9107 0.040 Uiso 1 1 calc R . .
C29 C 0.4793(5) 0.3410(6) 0.8550(5) 0.0393(18) Uani 1 1 d . . .
C30 C 0.4653(5) 0.3769(5) 0.7710(5) 0.0313(16) Uani 1 1 d . . .
C31 C 0.5417(5) 0.3831(5) 0.6901(5) 0.0264(15) Uani 1 1 d . . .
C32 C 0.6341(4) 0.3493(4) 0.6914(4) 0.0201(13) Uani 1 1 d . . .
H32 H 0.6852 0.3509 0.6374 0.024 Uiso 1 1 calc R . .
C33 C 0.8975(4) -0.0962(4) 0.7214(4) 0.0172(12) Uani 1 1 d . . .
C34 C 0.8836(4) -0.1831(4) 0.7936(4) 0.0207(13) Uani 1 1 d . . .
H34 H 0.8940 -0.1889 0.8462 0.025 Uiso 1 1 calc R . .
C35 C 0.8537(4) -0.2614(4) 0.7856(4) 0.0169(12) Uani 1 1 d . . .
C36 C 0.8416(4) -0.2536(4) 0.7050(4) 0.0161(12) Uani 1 1 d . . .
C37 C 0.8550(4) -0.1658(4) 0.6345(4) 0.0169(12) Uani 1 1 d . . .
C38 C 0.8837(4) -0.0867(4) 0.6417(4) 0.0179(12) Uani 1 1 d . . .
H38 H 0.8934 -0.0282 0.5938 0.022 Uiso 1 1 calc R . .
C39 C 1.2872(4) 0.0348(4) 0.7877(4) 0.0190(13) Uani 1 1 d . . .
C40 C 1.2889(5) -0.0571(4) 0.8493(4) 0.0235(13) Uani 1 1 d . . .
H40 H 1.2311 -0.0897 0.8897 0.028 Uiso 1 1 calc R . .
C41 C 1.3779(5) -0.0996(5) 0.8496(5) 0.0271(14) Uani 1 1 d . . .
C42 C 1.4638(5) -0.0514(5) 0.7924(5) 0.0296(15) Uani 1 1 d . . .
C43 C 1.4613(4) 0.0425(5) 0.7317(5) 0.0260(14) Uani 1 1 d . . .
C44 C 1.3741(5) 0.0851(4) 0.7301(4) 0.0249(14) Uani 1 1 d . . .
H44 H 1.3727 0.1474 0.6907 0.030 Uiso 1 1 calc R . .
C45 C 1.1299(5) 0.6737(5) 0.8329(5) 0.0285(15) Uani 1 1 d . . .
H45A H 1.0612 0.6658 0.8668 0.043 Uiso 1 1 calc R . .
H45B H 1.1530 0.7258 0.8389 0.043 Uiso 1 1 calc R . .
H45C H 1.1630 0.6164 0.8565 0.043 Uiso 1 1 calc R . .
C46 C 1.1400(5) 0.7895(5) 0.5229(5) 0.0389(18) Uani 1 1 d . . .
H46A H 1.1062 0.7620 0.4996 0.058 Uiso 1 1 calc R . .
H46B H 1.1783 0.8426 0.4739 0.058 Uiso 1 1 calc R . .
H46C H 1.0937 0.8109 0.5699 0.058 Uiso 1 1 calc R . .
C47 C 1.1425(5) 0.5242(5) 0.4738(5) 0.0365(18) Uani 1 1 d . . .
H47A H 1.1732 0.4642 0.4944 0.055 Uiso 1 1 calc R . .
H47B H 1.1657 0.5489 0.4079 0.055 Uiso 1 1 calc R . .
H47C H 1.0733 0.5154 0.4976 0.055 Uiso 1 1 calc R . .
C48 C 0.4179(7) 0.2988(11) 1.0178(6) 0.104(5) Uani 1 1 d . . .
H48A H 0.4367 0.2333 1.0293 0.156 Uiso 1 1 calc R . .
H48B H 0.3586 0.3032 1.0663 0.156 Uiso 1 1 calc R . .
H48C H 0.4683 0.3339 1.0154 0.156 Uiso 1 1 calc R . .
C49 C 0.3548(6) 0.5024(7) 0.7509(6) 0.057(3) Uani 1 1 d . . .
H49A H 0.3482 0.5187 0.8025 0.086 Uiso 1 1 calc R . .
H49B H 0.2960 0.5182 0.7380 0.086 Uiso 1 1 calc R . .
H49C H 0.4082 0.5374 0.6983 0.086 Uiso 1 1 calc R . .
C50 C 0.5988(5) 0.4286(5) 0.5265(5) 0.0362(17) Uani 1 1 d . . .
H50A H 0.6426 0.4768 0.5143 0.054 Uiso 1 1 calc R . .
H50B H 0.5743 0.4469 0.4776 0.054 Uiso 1 1 calc R . .
H50C H 0.6328 0.3692 0.5308 0.054 Uiso 1 1 calc R . .
C51 C 0.8375(5) -0.3602(4) 0.9409(4) 0.0275(14) Uani 1 1 d . . .
H51A H 0.9005 -0.3424 0.9329 0.041 Uiso 1 1 calc R . .
H51B H 0.8245 -0.4255 0.9810 0.041 Uiso 1 1 calc R . .
H51C H 0.7889 -0.3202 0.9673 0.041 Uiso 1 1 calc R . .
C52 C 0.8838(5) -0.3704(5) 0.6398(4) 0.0284(15) Uani 1 1 d . . .
H52A H 0.9096 -0.3224 0.5800 0.043 Uiso 1 1 calc R . .
H52B H 0.8576 -0.4218 0.6353 0.043 Uiso 1 1 calc R . .
H52C H 0.9347 -0.3940 0.6640 0.043 Uiso 1 1 calc R . .
C53 C 0.8544(6) -0.0762(4) 0.4837(4) 0.0321(16) Uani 1 1 d . . .
H53A H 0.8120 -0.0278 0.5018 0.048 Uiso 1 1 calc R . .
H53B H 0.8423 -0.0850 0.4353 0.048 Uiso 1 1 calc R . .
H53C H 0.9209 -0.0572 0.4623 0.048 Uiso 1 1 calc R . .
C54 C 1.3007(5) -0.2460(5) 0.9631(5) 0.0312(15) Uani 1 1 d . . .
H54A H 1.2571 -0.2148 1.0032 0.047 Uiso 1 1 calc R . .
H54B H 1.3169 -0.3078 0.9991 0.047 Uiso 1 1 calc R . .
H54C H 1.2698 -0.2529 0.9253 0.047 Uiso 1 1 calc R . .
C55 C 1.6005(6) -0.1339(6) 0.7294(7) 0.0550(17) Uani 1 1 d . . .
H55A H 1.5593 -0.1803 0.7341 0.083 Uiso 1 1 calc R . .
H55B H 1.6588 -0.1643 0.7382 0.083 Uiso 1 1 calc R . .
H55C H 1.6170 -0.0849 0.6697 0.083 Uiso 1 1 calc R . .
C56 C 1.5504(6) 0.1787(6) 0.6197(7) 0.0550(17) Uani 1 1 d . . .
H56A H 1.5146 0.1832 0.5817 0.083 Uiso 1 1 calc R . .
H56B H 1.6160 0.2000 0.5817 0.083 Uiso 1 1 calc R . .
H56C H 1.5202 0.2180 0.6560 0.083 Uiso 1 1 calc R . .
C57 C 0.3706(6) 0.7873(6) 0.6199(5) 0.051(2) Uani 1 1 d . . .
H57A H 0.3108 0.7630 0.6256 0.061 Uiso 1 1 calc R . .
H57B H 0.4247 0.7565 0.5855 0.061 Uiso 1 1 calc R . .
H58A H 0.908(5) 0.137(6) 0.948(5) 0.05(2) Uiso 1 1 d . . .
H58B H 0.926(6) 0.047(7) 0.913(6) 0.07(3) Uiso 1 1 d . . .
 
loop_
_atom_site_aniso_label
_atom_site_aniso_U_11
_atom_site_aniso_U_22
_atom_site_aniso_U_33
_atom_site_aniso_U_23
_atom_site_aniso_U_13
_atom_site_aniso_U_12
Fe1 0.0169(4) 0.0110(4) 0.0194(5) -0.0034(3) -0.0134(4) -0.0003(3)
Cl1 0.0310(9) 0.0185(7) 0.0181(8) -0.0015(6) -0.0101(7) -0.0035(6)
Cl2 0.0485(13) 0.0724(16) 0.0532(14) -0.0303(12) -0.0227(11) 0.0084(11)
Cl3 0.0729(17) 0.0537(15) 0.0589(16) -0.0109(12) -0.0043(13) 0.0125(12)
O1 0.023(2) 0.019(2) 0.016(2) -0.0038(17) -0.0081(18) -0.0056(17)
O2 0.027(2) 0.015(2) 0.028(2) -0.0090(18) -0.008(2) -0.0071(17)
O3 0.029(2) 0.017(2) 0.022(2) -0.0015(18) -0.0110(19) -0.0084(18)
O4 0.041(3) 0.026(2) 0.021(2) -0.0039(19) -0.008(2) -0.015(2)
O5 0.028(3) 0.117(6) 0.037(3) -0.020(4) -0.009(3) 0.011(3)
O6 0.029(3) 0.046(3) 0.063(4) -0.005(3) -0.029(3) 0.011(2)
O7 0.029(3) 0.039(3) 0.028(3) -0.009(2) -0.024(2) 0.011(2)
O8 0.039(3) 0.0077(19) 0.022(2) 0.0002(17) -0.014(2) -0.0088(17)
O9 0.028(2) 0.015(2) 0.029(2) -0.0120(18) -0.010(2) -0.0025(17)
O10 0.036(3) 0.019(2) 0.026(2) -0.0052(18) -0.022(2) -0.0016(19)
O11 0.030(3) 0.022(2) 0.049(3) 0.000(2) -0.022(2) 0.006(2)
O12 0.018(3) 0.034(3) 0.059(4) -0.003(3) -0.016(2) 0.004(2)
O13 0.033(3) 0.029(3) 0.053(3) -0.012(2) -0.026(3) -0.004(2)
O14 0.032(3) 0.012(2) 0.021(2) 0.0009(17) -0.020(2) 0.0010(18)
O15 0.023(2) 0.019(2) 0.027(2) -0.0081(18) -0.0153(19) -0.0005(17)
O16 0.067(4) 0.015(2) 0.044(3) -0.009(2) -0.038(3) 0.010(2)
O17 0.036(3) 0.032(3) 0.029(3) -0.002(2) -0.022(2) -0.011(2)
N1 0.016(3) 0.015(2) 0.021(3) -0.003(2) -0.009(2) -0.0013(19)
N2 0.020(3) 0.004(2) 0.021(3) -0.0050(18) -0.014(2) 0.0030(18)
N3 0.028(3) 0.015(2) 0.022(3) -0.004(2) -0.015(2) -0.001(2)
N4 0.025(3) 0.005(2) 0.029(3) -0.0060(19) -0.022(2) 0.0037(19)
N5 0.032(3) 0.022(3) 0.010(3) 0.000(2) -0.010(2) -0.001(2)
C1 0.021(2) 0.0120(19) 0.015(2) -0.0002(16) -0.0096(17) -0.0018(16)
C2 0.017(3) 0.026(3) 0.023(3) -0.007(3) -0.014(3) 0.000(2)
C3 0.026(3) 0.020(3) 0.028(4) -0.006(3) -0.020(3) -0.003(3)
C4 0.023(3) 0.014(3) 0.024(3) -0.001(2) -0.016(3) -0.004(2)
C5 0.031(3) 0.028(2) 0.017(3) -0.005(2) -0.015(3) -0.004(2)
C6 0.021(2) 0.0116(19) 0.014(2) 0.0035(16) -0.0048(17) -0.0026(16)
C7 0.021(2) 0.0116(19) 0.014(2) 0.0035(16) -0.0048(17) -0.0026(16)
C8 0.0209(4) 0.0116(4) 0.0141(4) 0.0035(4) -0.0048(4) -0.0026(4)
C9 0.018(3) 0.013(3) 0.018(3) 0.007(2) -0.012(2) -0.002(2)
C10 0.018(2) 0.0151(19) 0.017(2) 0.0023(16) -0.0094(17) -0.0008(16)
C11 0.033(4) 0.021(3) 0.014(3) 0.007(2) -0.014(3) -0.003(2)
C12 0.033(4) 0.016(3) 0.016(3) -0.003(2) -0.014(3) -0.003(3)
C13 0.016(3) 0.026(3) 0.032(4) -0.015(3) -0.015(3) -0.002(2)
C14 0.034(4) 0.013(3) 0.015(3) -0.001(2) -0.019(3) -0.004(2)
C15 0.018(3) 0.012(3) 0.017(3) 0.001(2) -0.013(2) -0.004(2)
C16 0.021(3) 0.016(3) 0.015(3) 0.001(2) -0.010(2) -0.003(2)
C17 0.025(3) 0.013(3) 0.025(3) -0.002(2) -0.012(3) -0.006(2)
C18 0.017(3) 0.019(3) 0.015(3) -0.006(2) -0.006(2) -0.002(2)
C19 0.018(3) 0.010(3) 0.018(3) -0.002(2) -0.008(2) 0.001(2)
C20 0.021(2) 0.0120(19) 0.015(2) -0.0002(16) -0.0096(17) -0.0018(16)
C21 0.017(3) 0.007(2) 0.026(3) -0.002(2) -0.008(2) -0.003(2)
C22 0.024(3) 0.019(3) 0.024(3) -0.009(3) -0.016(3) -0.001(2)
C23 0.013(3) 0.016(3) 0.023(3) -0.008(2) -0.006(2) -0.003(2)
C24 0.019(3) 0.013(3) 0.030(4) -0.002(3) -0.007(3) -0.006(2)
C25 0.014(3) 0.021(3) 0.032(4) -0.014(3) -0.009(3) 0.005(2)
C26 0.030(4) 0.014(3) 0.036(4) -0.011(3) -0.022(3) -0.001(2)
C27 0.018(2) 0.0151(19) 0.017(2) 0.0023(16) -0.0094(17) -0.0008(16)
C28 0.023(4) 0.040(4) 0.046(5) -0.016(3) -0.024(3) 0.005(3)
C29 0.014(3) 0.060(5) 0.039(4) -0.019(4) -0.004(3) 0.007(3)
C30 0.016(3) 0.044(4) 0.044(4) -0.025(4) -0.014(3) 0.009(3)
C31 0.031(3) 0.028(3) 0.049(4) -0.019(3) -0.028(3) 0.006(3)
C32 0.022(3) 0.017(3) 0.020(3) -0.001(2) -0.011(3) -0.003(2)
C33 0.019(3) 0.013(3) 0.021(3) -0.005(2) -0.007(2) -0.006(2)
C34 0.026(3) 0.017(3) 0.020(3) -0.004(2) -0.011(3) -0.003(2)
C35 0.012(3) 0.015(3) 0.020(3) -0.007(2) -0.003(2) 0.004(2)
C36 0.023(3) 0.013(3) 0.014(3) -0.004(2) -0.008(2) -0.001(2)
C37 0.017(3) 0.017(3) 0.024(3) -0.010(2) -0.013(3) 0.003(2)
C38 0.021(3) 0.010(3) 0.027(3) -0.002(2) -0.018(3) 0.003(2)
C39 0.024(3) 0.015(3) 0.028(3) -0.009(2) -0.018(3) 0.001(2)
C40 0.027(3) 0.021(3) 0.026(4) -0.006(3) -0.016(3) 0.002(3)
C41 0.028(4) 0.023(3) 0.031(4) -0.003(3) -0.016(3) -0.006(3)
C42 0.025(4) 0.027(3) 0.043(4) -0.008(3) -0.024(3) 0.003(3)
C43 0.013(3) 0.028(3) 0.041(4) -0.014(3) -0.013(3) -0.002(3)
C44 0.034(4) 0.019(3) 0.029(4) -0.007(3) -0.016(3) -0.009(3)
C45 0.033(4) 0.021(3) 0.039(4) -0.010(3) -0.019(3) -0.007(3)
C46 0.043(5) 0.023(4) 0.038(4) 0.003(3) -0.016(4) 0.003(3)
C47 0.049(5) 0.037(4) 0.028(4) -0.005(3) -0.015(3) -0.024(3)
C48 0.028(5) 0.226(16) 0.036(6) -0.031(8) -0.011(4) 0.021(7)
C49 0.033(5) 0.080(7) 0.065(6) -0.025(5) -0.032(5) 0.021(4)
C50 0.041(4) 0.042(4) 0.031(4) -0.008(3) -0.026(4) 0.010(3)
C51 0.036(4) 0.020(3) 0.024(4) 0.000(3) -0.013(3) -0.004(3)
C52 0.041(4) 0.026(3) 0.017(3) -0.009(3) -0.004(3) -0.009(3)
C53 0.059(5) 0.022(3) 0.026(4) -0.006(3) -0.025(4) -0.012(3)
C54 0.028(4) 0.023(3) 0.031(4) 0.003(3) -0.010(3) -0.003(3)
C55 0.027(3) 0.059(4) 0.096(5) -0.044(4) -0.027(3) 0.012(3)
C56 0.027(3) 0.059(4) 0.096(5) -0.044(4) -0.027(3) 0.012(3)
C57 0.037(5) 0.061(6) 0.036(5) -0.003(4) -0.004(4) -0.009(4)
 
_geom_special_details
;
 All esds (except the esd in the dihedral angle between two l.s. planes)
 are estimated using the full covariance matrix.  The cell esds are taken
 into account individually in the estimation of esds in distances, angles
 and torsion angles; correlations between esds in cell parameters are only
 used when they are defined by crystal symmetry.  An approximate (isotropic)
 treatment of cell esds is used for estimating esds involving l.s. planes.
;
 
loop_
_geom_bond_atom_site_label_1
_geom_bond_atom_site_label_2
_geom_bond_distance
_geom_bond_site_symmetry_2
_geom_bond_publ_flag
Fe1 N3 2.052(5) . ?
Fe1 N4 2.059(4) . ?
Fe1 N2 2.100(4) . ?
Fe1 N1 2.100(5) . ?
Fe1 O14 2.140(4) . ?
Fe1 Cl1 2.2926(18) . ?
Cl2 C57 1.757(8) . ?
Cl3 C57 1.763(9) . ?
O1 C5 1.448(6) . ?
O1 H1 0.8200 . ?
O2 C23 1.372(6) . ?
O2 C45 1.433(8) . ?
O3 C24 1.372(7) . ?
O3 C46 1.431(7) . ?
O4 C25 1.357(7) . ?
O4 C47 1.425(7) . ?
O5 C29 1.339(8) . ?
O5 C48 1.448(10) . ?
O6 C30 1.381(7) . ?
O6 C49 1.409(10) . ?
O7 C31 1.375(7) . ?
O7 C50 1.451(8) . ?
O8 C35 1.370(7) . ?
O8 C51 1.429(7) . ?
O9 C36 1.375(6) . ?
O9 C52 1.432(7) . ?
O10 C37 1.370(6) . ?
O10 C53 1.423(7) . ?
O11 C41 1.381(7) . ?
O11 C54 1.412(8) . ?
O12 C42 1.386(7) . ?
O12 C55 1.393(9) . ?
O13 C43 1.363(8) . ?
O13 C56 1.422(10) . ?
O14 H58A 0.99(8) . ?
O14 H58B 0.90(9) . ?
O15 N5 1.286(6) . ?
O16 N5 1.236(6) . ?
O17 N5 1.238(6) . ?
N1 C4 1.319(7) . ?
N1 C1 1.415(7) . ?
N2 C6 1.314(7) . ?
N2 C9 1.430(7) . ?
N3 C11 1.352(7) . ?
N3 C14 1.400(7) . ?
N4 C19 1.364(7) . ?
N4 C16 1.385(7) . ?
C1 C20 1.384(7) . ?
C1 C2 1.451(8) . ?
C2 C3 1.343(8) . ?
C2 H2 0.9300 . ?
C3 C4 1.444(8) . ?
C3 H3 0.9300 . ?
C4 C5 1.496(8) . ?
C5 C6 1.502(8) . ?
C5 C21 1.550(8) . ?
C6 C7 1.440(8) . ?
C7 C8 1.377(8) . ?
C7 H7 0.9300 . ?
C8 C9 1.461(8) . ?
C8 H8 0.9300 . ?
C9 C10 1.365(8) . ?
C10 C11 1.443(8) . ?
C10 C27 1.499(8) . ?
C11 C12 1.424(8) . ?
C12 C13 1.349(8) . ?
C12 H12 0.9300 . ?
C13 C14 1.435(8) . ?
C13 H13 0.9300 . ?
C14 C15 1.407(8) . ?
C15 C16 1.390(7) . ?
C15 C33 1.484(7) . ?
C16 C17 1.436(8) . ?
C17 C18 1.358(8) . ?
C17 H17 0.9300 . ?
C18 C19 1.404(7) . ?
C18 H18 0.9300 . ?
C19 C20 1.458(8) . ?
C20 C39 1.491(8) . ?
C21 C22 1.377(7) . ?
C21 C26 1.390(8) . ?
C22 C23 1.402(8) . ?
C22 H22 0.9300 . ?
C23 C24 1.406(8) . ?
C24 C25 1.405(8) . ?
C25 C26 1.387(9) . ?
C26 H26 0.9300 . ?
C27 C28 1.380(9) . ?
C27 C32 1.382(8) . ?
C28 C29 1.416(9) . ?
C28 H28 0.9300 . ?
C29 C30 1.401(10) . ?
C30 C31 1.381(9) . ?
C31 C32 1.404(8) . ?
C32 H32 0.9300 . ?
C33 C38 1.391(8) . ?
C33 C34 1.389(8) . ?
C34 C35 1.396(8) . ?
C34 H34 0.9300 . ?
C35 C36 1.400(8) . ?
C36 C37 1.386(8) . ?
C37 C38 1.392(8) . ?
C38 H38 0.9300 . ?
C39 C40 1.392(8) . ?
C39 C44 1.398(9) . ?
C40 C41 1.389(8) . ?
C40 H40 0.9300 . ?
C41 C42 1.374(9) . ?
C42 C43 1.410(9) . ?
C43 C44 1.371(8) . ?
C44 H44 0.9300 . ?
C45 H45A 0.9600 . ?
C45 H45B 0.9600 . ?
C45 H45C 0.9600 . ?
C46 H46A 0.9600 . ?
C46 H46B 0.9600 . ?
C46 H46C 0.9600 . ?
C47 H47A 0.9600 . ?
C47 H47B 0.9600 . ?
C47 H47C 0.9600 . ?
C48 H48A 0.9600 . ?
C48 H48B 0.9600 . ?
C48 H48C 0.9600 . ?
C49 H49A 0.9600 . ?
C49 H49B 0.9600 . ?
C49 H49C 0.9600 . ?
C50 H50A 0.9600 . ?
C50 H50B 0.9600 . ?
C50 H50C 0.9600 . ?
C51 H51A 0.9600 . ?
C51 H51B 0.9600 . ?
C51 H51C 0.9600 . ?
C52 H52A 0.9600 . ?
C52 H52B 0.9600 . ?
C52 H52C 0.9600 . ?
C53 H53A 0.9600 . ?
C53 H53B 0.9600 . ?
C53 H53C 0.9600 . ?
C54 H54A 0.9600 . ?
C54 H54B 0.9600 . ?
C54 H54C 0.9600 . ?
C55 H55A 0.9600 . ?
C55 H55B 0.9600 . ?
C55 H55C 0.9600 . ?
C56 H56A 0.9600 . ?
C56 H56B 0.9600 . ?
C56 H56C 0.9600 . ?
C57 H57A 0.9700 . ?
C57 H57B 0.9700 . ?
 
loop_
_geom_angle_atom_site_label_1
_geom_angle_atom_site_label_2
_geom_angle_atom_site_label_3
_geom_angle
_geom_angle_site_symmetry_1
_geom_angle_site_symmetry_3
_geom_angle_publ_flag
N3 Fe1 N4 90.15(18) . . ?
N3 Fe1 N2 90.87(18) . . ?
N4 Fe1 N2 169.39(19) . . ?
N3 Fe1 N1 172.8(2) . . ?
N4 Fe1 N1 90.00(18) . . ?
N2 Fe1 N1 87.68(18) . . ?
N3 Fe1 O14 84.42(18) . . ?
N4 Fe1 O14 85.87(19) . . ?
N2 Fe1 O14 83.72(18) . . ?
N1 Fe1 O14 88.41(18) . . ?
N3 Fe1 Cl1 93.41(15) . . ?
N4 Fe1 Cl1 96.76(15) . . ?
N2 Fe1 Cl1 93.72(13) . . ?
N1 Fe1 Cl1 93.73(14) . . ?
O14 Fe1 Cl1 176.60(13) . . ?
C5 O1 H1 109.5 . . ?
C23 O2 C45 115.9(5) . . ?
C24 O3 C46 112.9(5) . . ?
C25 O4 C47 117.4(5) . . ?
C29 O5 C48 117.8(6) . . ?
C30 O6 C49 114.2(6) . . ?
C31 O7 C50 115.9(5) . . ?
C35 O8 C51 119.0(4) . . ?
C36 O9 C52 111.5(5) . . ?
C37 O10 C53 117.9(4) . . ?
C41 O11 C54 118.2(5) . . ?
C42 O12 C55 114.4(6) . . ?
C43 O13 C56 114.7(5) . . ?
Fe1 O14 H58A 113(5) . . ?
Fe1 O14 H58B 102(6) . . ?
H58A O14 H58B 119(7) . . ?
C4 N1 C1 106.7(5) . . ?
C4 N1 Fe1 128.3(4) . . ?
C1 N1 Fe1 125.1(4) . . ?
C6 N2 C9 106.5(4) . . ?
C6 N2 Fe1 129.6(4) . . ?
C9 N2 Fe1 123.6(3) . . ?
C11 N3 C14 105.7(5) . . ?
C11 N3 Fe1 127.4(4) . . ?
C14 N3 Fe1 126.7(4) . . ?
C19 N4 C16 106.9(4) . . ?
C19 N4 Fe1 127.6(4) . . ?
C16 N4 Fe1 125.3(4) . . ?
O16 N5 O17 122.3(5) . . ?
O16 N5 O15 118.9(5) . . ?
O17 N5 O15 118.8(5) . . ?
C20 C1 N1 125.9(5) . . ?
C20 C1 C2 125.9(5) . . ?
N1 C1 C2 108.2(5) . . ?
C3 C2 C1 106.6(5) . . ?
C3 C2 H2 126.7 . . ?
C1 C2 H2 126.7 . . ?
C2 C3 C4 107.6(5) . . ?
C2 C3 H3 126.2 . . ?
C4 C3 H3 126.2 . . ?
N1 C4 C3 110.9(5) . . ?
N1 C4 C5 128.0(5) . . ?
C3 C4 C5 121.1(5) . . ?
O1 C5 C4 107.3(4) . . ?
O1 C5 C6 107.3(5) . . ?
C4 C5 C6 119.2(4) . . ?
O1 C5 C21 105.8(4) . . ?
C4 C5 C21 107.9(5) . . ?
C6 C5 C21 108.5(4) . . ?
N2 C6 C7 112.4(5) . . ?
N2 C6 C5 126.6(5) . . ?
C7 C6 C5 121.0(5) . . ?
C8 C7 C6 106.7(5) . . ?
C8 C7 H7 126.6 . . ?
C6 C7 H7 126.6 . . ?
C7 C8 C9 106.3(5) . . ?
C7 C8 H8 126.9 . . ?
C9 C8 H8 126.9 . . ?
C10 C9 N2 125.1(5) . . ?
C10 C9 C8 126.8(5) . . ?
N2 C9 C8 108.1(5) . . ?
C9 C10 C11 128.3(5) . . ?
C9 C10 C27 117.3(5) . . ?
C11 C10 C27 114.3(5) . . ?
N3 C11 C12 111.3(5) . . ?
N3 C11 C10 124.3(5) . . ?
C12 C11 C10 124.4(5) . . ?
C13 C12 C11 106.7(5) . . ?
C13 C12 H12 126.6 . . ?
C11 C12 H12 126.6 . . ?
C12 C13 C14 107.7(5) . . ?
C12 C13 H13 126.2 . . ?
C14 C13 H13 126.2 . . ?
N3 C14 C15 125.0(5) . . ?
N3 C14 C13 108.6(5) . . ?
C15 C14 C13 126.3(5) . . ?
C16 C15 C14 125.2(5) . . ?
C16 C15 C33 118.7(5) . . ?
C14 C15 C33 116.1(5) . . ?
N4 C16 C15 127.3(5) . . ?
N4 C16 C17 108.0(5) . . ?
C15 C16 C17 124.7(5) . . ?
C18 C17 C16 107.5(5) . . ?
C18 C17 H17 126.3 . . ?
C16 C17 H17 126.3 . . ?
C17 C18 C19 107.3(5) . . ?
C17 C18 H18 126.3 . . ?
C19 C18 H18 126.3 . . ?
N4 C19 C18 110.2(5) . . ?
N4 C19 C20 124.8(5) . . ?
C18 C19 C20 125.0(5) . . ?
C1 C20 C19 126.1(5) . . ?
C1 C20 C39 118.6(5) . . ?
C19 C20 C39 115.3(5) . . ?
C22 C21 C26 122.0(5) . . ?
C22 C21 C5 119.6(5) . . ?
C26 C21 C5 118.4(5) . . ?
C21 C22 C23 119.8(5) . . ?
C21 C22 H22 120.1 . . ?
C23 C22 H22 120.1 . . ?
O2 C23 C22 125.2(5) . . ?
O2 C23 C24 115.5(5) . . ?
C22 C23 C24 119.3(5) . . ?
O3 C24 C25 121.3(6) . . ?
O3 C24 C23 119.3(5) . . ?
C25 C24 C23 119.2(5) . . ?
O4 C25 C26 124.5(5) . . ?
O4 C25 C24 114.2(5) . . ?
C26 C25 C24 121.2(6) . . ?
C25 C26 C21 118.4(5) . . ?
C25 C26 H26 120.8 . . ?
C21 C26 H26 120.8 . . ?
C28 C27 C32 121.9(6) . . ?
C28 C27 C10 120.9(5) . . ?
C32 C27 C10 117.2(5) . . ?
C27 C28 C29 119.4(6) . . ?
C27 C28 H28 120.3 . . ?
C29 C28 H28 120.3 . . ?
O5 C29 C30 118.4(6) . . ?
O5 C29 C28 123.0(7) . . ?
C30 C29 C28 118.7(6) . . ?
O6 C30 C31 120.7(6) . . ?
O6 C30 C29 118.4(6) . . ?
C31 C30 C29 120.9(6) . . ?
O7 C31 C30 115.4(5) . . ?
O7 C31 C32 124.3(6) . . ?
C30 C31 C32 120.2(6) . . ?
C27 C32 C31 118.9(6) . . ?
C27 C32 H32 120.6 . . ?
C31 C32 H32 120.6 . . ?
C38 C33 C34 121.3(5) . . ?
C38 C33 C15 120.6(5) . . ?
C34 C33 C15 118.1(5) . . ?
C33 C34 C35 118.8(5) . . ?
C33 C34 H34 120.6 . . ?
C35 C34 H34 120.6 . . ?
O8 C35 C34 123.4(5) . . ?
O8 C35 C36 115.9(5) . . ?
C34 C35 C36 120.7(5) . . ?
O9 C36 C37 120.5(5) . . ?
O9 C36 C35 120.1(5) . . ?
C37 C36 C35 119.2(5) . . ?
O10 C37 C36 115.5(5) . . ?
O10 C37 C38 123.6(5) . . ?
C36 C37 C38 120.8(5) . . ?
C33 C38 C37 119.1(5) . . ?
C33 C38 H38 120.4 . . ?
C37 C38 H38 120.4 . . ?
C40 C39 C44 120.0(5) . . ?
C40 C39 C20 121.1(6) . . ?
C44 C39 C20 118.9(5) . . ?
C39 C40 C41 119.2(6) . . ?
C39 C40 H40 120.4 . . ?
C41 C40 H40 120.4 . . ?
C42 C41 O11 115.8(6) . . ?
C42 C41 C40 121.2(6) . . ?
O11 C41 C40 123.0(6) . . ?
C41 C42 O12 120.3(6) . . ?
C41 C42 C43 119.2(6) . . ?
O12 C42 C43 120.5(6) . . ?
O13 C43 C44 126.1(6) . . ?
O13 C43 C42 113.6(5) . . ?
C44 C43 C42 120.2(6) . . ?
C43 C44 C39 120.1(6) . . ?
C43 C44 H44 120.0 . . ?
C39 C44 H44 120.0 . . ?
O2 C45 H45A 109.5 . . ?
O2 C45 H45B 109.5 . . ?
H45A C45 H45B 109.5 . . ?
O2 C45 H45C 109.5 . . ?
H45A C45 H45C 109.5 . . ?
H45B C45 H45C 109.5 . . ?
O3 C46 H46A 109.5 . . ?
O3 C46 H46B 109.5 . . ?
H46A C46 H46B 109.5 . . ?
O3 C46 H46C 109.5 . . ?
H46A C46 H46C 109.5 . . ?
H46B C46 H46C 109.5 . . ?
O4 C47 H47A 109.5 . . ?
O4 C47 H47B 109.5 . . ?
H47A C47 H47B 109.5 . . ?
O4 C47 H47C 109.5 . . ?
H47A C47 H47C 109.5 . . ?
H47B C47 H47C 109.5 . . ?
O5 C48 H48A 109.5 . . ?
O5 C48 H48B 109.5 . . ?
H48A C48 H48B 109.5 . . ?
O5 C48 H48C 109.5 . . ?
H48A C48 H48C 109.5 . . ?
H48B C48 H48C 109.5 . . ?
O6 C49 H49A 109.5 . . ?
O6 C49 H49B 109.5 . . ?
H49A C49 H49B 109.5 . . ?
O6 C49 H49C 109.5 . . ?
H49A C49 H49C 109.5 . . ?
H49B C49 H49C 109.5 . . ?
O7 C50 H50A 109.5 . . ?
O7 C50 H50B 109.5 . . ?
H50A C50 H50B 109.5 . . ?
O7 C50 H50C 109.5 . . ?
H50A C50 H50C 109.5 . . ?
H50B C50 H50C 109.5 . . ?
O8 C51 H51A 109.5 . . ?
O8 C51 H51B 109.5 . . ?
H51A C51 H51B 109.5 . . ?
O8 C51 H51C 109.5 . . ?
H51A C51 H51C 109.5 . . ?
H51B C51 H51C 109.5 . . ?
O9 C52 H52A 109.5 . . ?
O9 C52 H52B 109.5 . . ?
H52A C52 H52B 109.5 . . ?
O9 C52 H52C 109.5 . . ?
H52A C52 H52C 109.5 . . ?
H52B C52 H52C 109.5 . . ?
O10 C53 H53A 109.5 . . ?
O10 C53 H53B 109.5 . . ?
H53A C53 H53B 109.5 . . ?
O10 C53 H53C 109.5 . . ?
H53A C53 H53C 109.5 . . ?
H53B C53 H53C 109.5 . . ?
O11 C54 H54A 109.5 . . ?
O11 C54 H54B 109.5 . . ?
H54A C54 H54B 109.5 . . ?
O11 C54 H54C 109.5 . . ?
H54A C54 H54C 109.5 . . ?
H54B C54 H54C 109.5 . . ?
O12 C55 H55A 109.5 . . ?
O12 C55 H55B 109.5 . . ?
H55A C55 H55B 109.5 . . ?
O12 C55 H55C 109.5 . . ?
H55A C55 H55C 109.5 . . ?
H55B C55 H55C 109.5 . . ?
O13 C56 H56A 109.5 . . ?
O13 C56 H56B 109.5 . . ?
H56A C56 H56B 109.5 . . ?
O13 C56 H56C 109.5 . . ?
H56A C56 H56C 109.5 . . ?
H56B C56 H56C 109.5 . . ?
Cl2 C57 Cl3 111.6(5) . . ?
Cl2 C57 H57A 109.3 . . ?
Cl3 C57 H57A 109.3 . . ?
Cl2 C57 H57B 109.3 . . ?
Cl3 C57 H57B 109.3 . . ?
H57A C57 H57B 108.0 . . ?
 
_diffrn_measured_fraction_theta_max 0.986
_diffrn_reflns_theta_full        28.35
_diffrn_measured_fraction_theta_full 0.956
_refine_diff_density_max         0.934
_refine_diff_density_min         -0.852
_refine_diff_density_rms         0.131
 
loop_
_platon_squeeze_void_nr
_platon_squeeze_void_average_x
_platon_squeeze_void_average_y
_platon_squeeze_void_average_z
_platon_squeeze_void_volume
_platon_squeeze_void_count_electrons
1 0.500 0.000 0.000 197.2 48.6
2 0.500 0.500 0.000 426.9 83.9
 
